# Supplementary material for: Unravelling the effects of oxidation state of interstitial iodine and oxygen passivation on charge trapping and recombination in CH3NH3PbI3 perovskite: a time-domain ab initio study
Source: Royal Society of Chemistry journal article supplement (doi:10.1039/c9sc02353d), 2019-01-01
Supplement: c9sc02353d1.pdf [file c9sc02353d1.pdf]

Supporting Information for:

**Unravelling the Effects of Oxidation State of Interstitial Iodine  
and Oxygen Inhibits Charge Trapping and Recombination in  
CH<sub>3</sub>NH<sub>3</sub>PbI<sub>3</sub> Perovskite: A Time-Domain Ab Initio Study**

Jinlu He, Wei-Hai Fang, Run Long\*

*College of Chemistry, Key Laboratory of Theoretical & Computational*

*Photochemistry of Ministry of Education, Beijing Normal University, Beijing, 100875,*

*P. R. China*

**S1 Coupled Kinetic Equations**

Here, we consider the following processes that characterize the charge carrier relaxation pathways in pristine MAPbI<sub>3</sub>, I<sub>i</sub>, I<sub>i</sub><sup>-1</sup>, I<sub>i</sub><sup>+1</sup> and IO<sub>3</sub><sup>-1</sup> systems. The schematics of related charge processes are depicted in Figure S1-S4. The obtained charge trapping and recombination dynamics between two states are shown in Figure S5-S13. Here, the transition rate between the conduction band minimum (CBM) and valence band maximum (VBM), CBM and electron trap, electron trap and VBM, VBM and hole trap is denoted by  $k_{(\text{cbm} \rightarrow \text{vbm})}$ ,  $k_{(\text{cbm} \rightarrow \text{trap})}$ ,  $k_{(\text{trap} \rightarrow \text{vbm})}$ ,  $k_{(\text{vbm} \rightarrow \text{trap})}$ , respectively. The rate constants shown in Figure S5-S13 are obtained by fitting the key state population to an function  $f(t) = t/A$ . Constant A is depending on the system.

---

\* Corresponding author, E-mail: runlong@bnu.edu.cn

(a) pristine MAPbI<sub>3</sub>: electron-hole recombination across CBM and VBM. Figure S1 gives the basis set. The time-dependent populations of excited state (CBM) and ground state (VBM) are described by equations 1-2 and their solutions are given by equations 3-4. Figure S5 gives the ground state population growing and rate constant.

**coupled kinetic equations:**

$$\frac{d[ES]}{dt} = -k_{(cbm \rightarrow vbm)}[ES] \quad (1)$$

$$\frac{d[GS]}{dt} = k_{(cbm \rightarrow vbm)}[ES] \quad (2)$$

**the solutions for this set of equations are:**

$$[ES] = e^{-k_{(cbm \rightarrow vbm)} * t} \quad (3)$$

$$[GS] = 1 - e^{-k_{(cbm \rightarrow vbm)} * t} \quad (4)$$

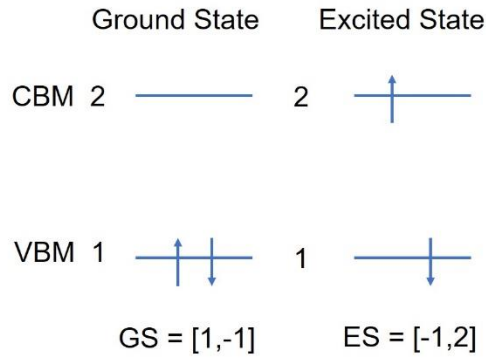

**Figure S1.** The schematic of electron-hole recombination pathway in pristine MAPbI<sub>3</sub>.

(b) I<sub>i</sub>: electron-hole recombination mediated by trap states. Figure S2 and S3 give the basis set of electron trap- and hole trap-assisted electron-hole recombination. The electron-trap assisted charge recombination is described by equations 5-7 and whose solutions are presented in equations 8-10. The hole-trap mediated electron-hole recombination is described by equations 11-13 and the corresponding solutions are shown in equations 14-16. The dynamics processes and transition constants of  $k_{(cbm \rightarrow vbm)}$ ,  $k_{(vbm \rightarrow trap)}$ ,  $k_{(cbm \rightarrow trap)}$  are shown in Figure S6-S8.

### **coupled kinetic equations for electron-hole recombination containing electron**

#### **trapping:**

$$\frac{d[ES]}{dt} = -(k_{(cbm \rightarrow vbm)} + k_{(cbm \rightarrow trap)})[ES] \quad (5)$$

$$\frac{d[trap]}{dt} = k_{(cbm \rightarrow trap)}[ES] - k_{(trap \rightarrow vbm)}[trap] \quad (6)$$

$$\frac{d[GS]}{dt} = k_{(cbm \rightarrow vbm)}[ES] + k_{(trap \rightarrow vbm)}[trap] \quad (7)$$

#### **the solutions for this set of equations are:**

$$[ES] = e^{-(k_{(cbm \rightarrow vbm)} + k_{(cbm \rightarrow trap)}) * t} \quad (8)$$

$$[trap] = \frac{k_{(cbm \rightarrow trap)}}{(k_{(cbm \rightarrow vbm)} + k_{(cbm \rightarrow trap)} - k_{(trap \rightarrow vbm)})} \left( e^{-k_{(trap \rightarrow vbm)} * t} - e^{-(k_{(cbm \rightarrow vbm)} + k_{(cbm \rightarrow trap)}) * t} \right) \quad (9)$$

$$[GS] = 1 - \frac{1}{(k_{(cbm \rightarrow vbm)} + k_{(cbm \rightarrow trap)} - k_{(trap \rightarrow vbm)})} \left\{ k_{(cbm \rightarrow trap)} * e^{-k_{(trap \rightarrow vbm)} * t} - (k_{(cbm \rightarrow vbm)} - k_{(trap \rightarrow vbm)}) * e^{-(k_{(cbm \rightarrow vbm)} + k_{(cbm \rightarrow trap)}) * t} \right\} \quad (10)$$

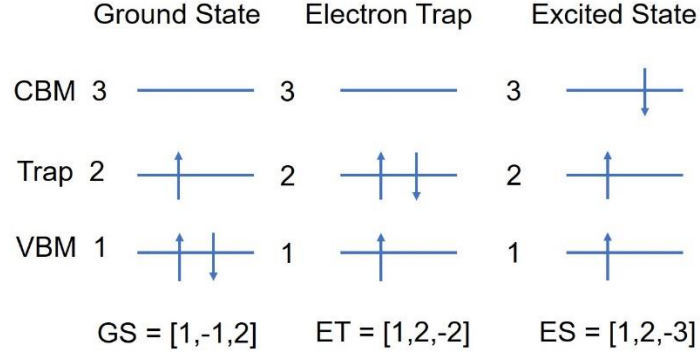

**Figure S2.** The schematic of electron-hole recombination containing electron trapping pathways in  $I_i$ .

**coupled kinetic equations for electron-hole recombination containing hole trapping:**

$$\frac{d[ES]}{dt} = -(k_{(cbm \rightarrow vbm)} + k_{(vbm \rightarrow trap)})[ES] \quad (11)$$

$$\frac{d[trap]}{dt} = k_{(vbm \rightarrow trap)}[ES] - k_{(cbm \rightarrow trap)}[trap] \quad (12)$$

$$\frac{d[GS]}{dt} = k_{(cbm \rightarrow vbm)}[ES] + k_{(cbm \rightarrow trap)}[trap] \quad (13)$$

**the solutions for this set of equations are:**

$$[ES] = e^{-(k_{(cbm \rightarrow vbm)} + k_{(vbm \rightarrow trap)}) * t} \quad (14)$$

$$[trap] = \frac{k_{(vbm \rightarrow trap)}}{(k_{(cbm \rightarrow vbm)} - k_{(cbm \rightarrow trap)} + k_{(vbm \rightarrow trap)})} \left( e^{-k_{(cbm \rightarrow trap)} * t} - e^{-(k_{(cbm \rightarrow vbm)} + k_{(vbm \rightarrow trap)}) * t} \right) \quad (15)$$

$$[GS] = 1 - \frac{k_{(vbm \rightarrow trap)}}{(k_{(cbm \rightarrow vbm)} - k_{(cbm \rightarrow trap)} + k_{(vbm \rightarrow trap)})} \left( e^{-k_{(cbm \rightarrow trap)} * t} - \frac{((k_{(cbm \rightarrow vbm)} - k_{(cbm \rightarrow trap)})}{(k_{(cbm \rightarrow vbm)} - k_{(cbm \rightarrow trap)} + k_{(vbm \rightarrow trap)})} \left( e^{-(k_{(cbm \rightarrow vbm)} + k_{(vbm \rightarrow trap)}) * t} \right) \right) \quad (16)$$

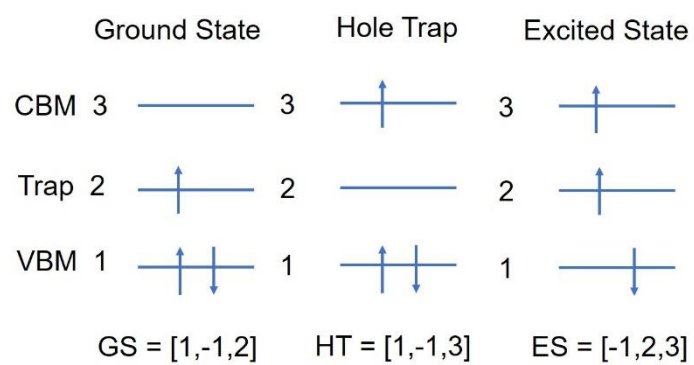

**Figure S3.** The schematic of electron-hole recombination containing hole trapping pathways in  $I_i$ .

(c)  $I_i^{-1}$ : electron-hole recombination across CBM and VBM of the system. The transition rate  $k_{(\text{cbm} \rightarrow \text{vbm})}$  is obtained by fitting the ground state (VBM) population (Figure S9). The kinetic processes and basis set are same to the pristine MAPbI<sub>3</sub>, see equations 1-4 and Figure S1.

(d)  $I_i^{+1}$ : electron-trap assisted electron-hole recombination. The time-dependent populations of the excited state (CBM), trap state, and ground state (VBM) are described by equations 17-19 and whose solutions are presented in equations 20-22. The basis set is shown in Figure S4. The transition rates  $k_{(\text{cbm} \rightarrow \text{vbm})}$ ,  $k_{(\text{trap} \rightarrow \text{vbm})}$ ,  $k_{(\text{cbm} \rightarrow \text{trap})}$  are obtained by fitting the key state population shown in Figure S10-S12.

**coupled kinetic equations:**

$$\frac{d[\text{ES}]}{dt} = -(k_{(\text{cbm} \rightarrow \text{vbm})} + k_{(\text{cbm} \rightarrow \text{trap})})[\text{ES}] \quad (17)$$

$$\frac{d[\text{trap}]}{dt} = k_{(\text{cbm} \rightarrow \text{trap})}[\text{ES}] - k_{(\text{trap} \rightarrow \text{vbm})}[\text{trap}] \quad (18)$$

$$\frac{d[\text{GS}]}{dt} = k_{(\text{cbm} \rightarrow \text{vbm})}[\text{ES}] + k_{(\text{trap} \rightarrow \text{vbm})}[\text{trap}] \quad (19)$$

**the solutions for this set of equations are:**

$$[\text{ES}] = e^{-(k_{(\text{cbm} \rightarrow \text{vbm})} + k_{(\text{cbm} \rightarrow \text{trap})}) * t} \quad (20)$$

$$[\text{trap}] = \frac{k_{(\text{cbm} \rightarrow \text{trap})}}{(k_{(\text{cbm} \rightarrow \text{vbm})} + k_{(\text{cbm} \rightarrow \text{trap})} - k_{(\text{trap} \rightarrow \text{vbm})})} (e^{-k_{(\text{trap} \rightarrow \text{vbm})} * t} - e^{-(k_{(\text{cbm} \rightarrow \text{vbm})} + k_{(\text{cbm} \rightarrow \text{trap})}) * t}) \quad (21)$$

$$[\text{GS}] = 1 - \frac{1}{(k_{(\text{cbm} \rightarrow \text{vbm})} + k_{(\text{cbm} \rightarrow \text{trap})} - k_{(\text{trap} \rightarrow \text{vbm})})} \{k_{(\text{cbm} \rightarrow \text{trap})} * e^{-k_{(\text{trap} \rightarrow \text{vbm})} * t} - (k_{(\text{cbm} \rightarrow \text{vbm})} - k_{(\text{trap} \rightarrow \text{vbm})}) * e^{-(k_{(\text{cbm} \rightarrow \text{vbm})} + k_{(\text{cbm} \rightarrow \text{trap})}) * t}\} \quad (22)$$

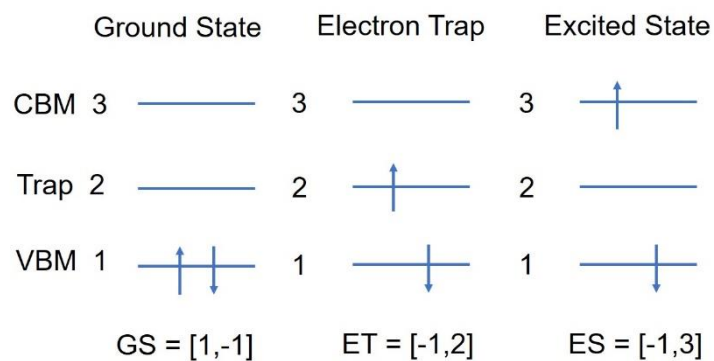

**Figure S4.** The schematic of electron-hole recombination and electron trapping pathways in  $I_i^{+1}$ .

(e)  $IO_3^{-1}$ : electron-hole recombination across CBM and VBM of the system. The transition rate  $k_{(cbm \rightarrow vbm)}$  is obtained by fitting the ground state (VBM) population (Figure S13). The kinetic equations, solutions and basis set is same to the pristine MAPbI<sub>3</sub>, see equations 1-4 and Figure S1.

## S2 Additional Figures

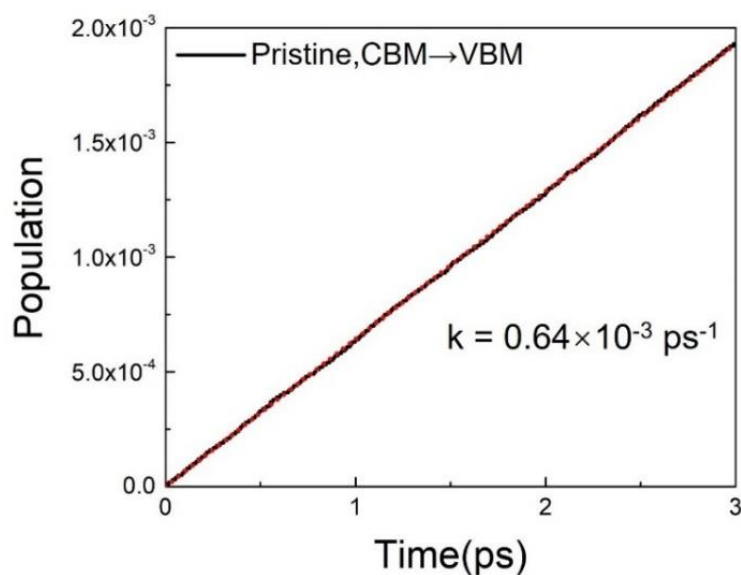

**Figure S5.** Time evolution of the ground state's population due to recombination of the valence band hole with conduction band electron in pristine MAPbI<sub>3</sub>. The fitting function is  $f(t) = t/(1.554 \times 10^6)$ .

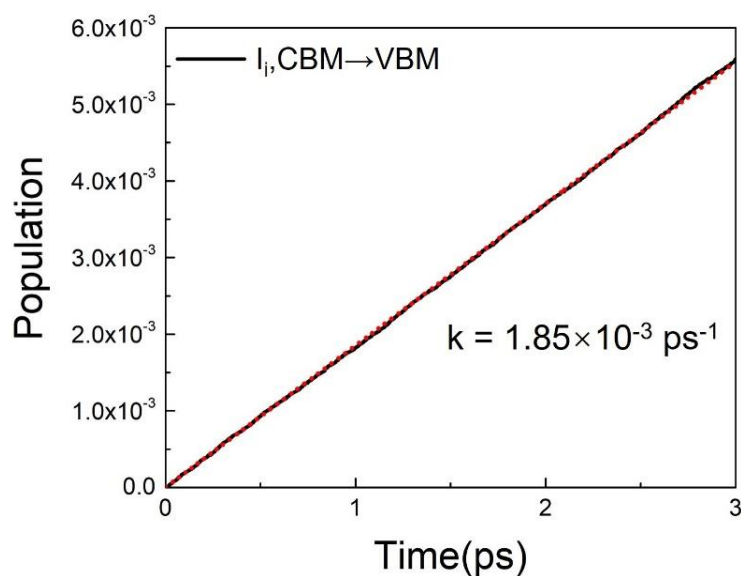

**Figure S6.** Time evolution of the ground state's population due to recombination of the valence band hole with conduction band electron in I<sub>i</sub>. The fitting function is  $f(t) = t/(0.540 \times 10^6)$ .



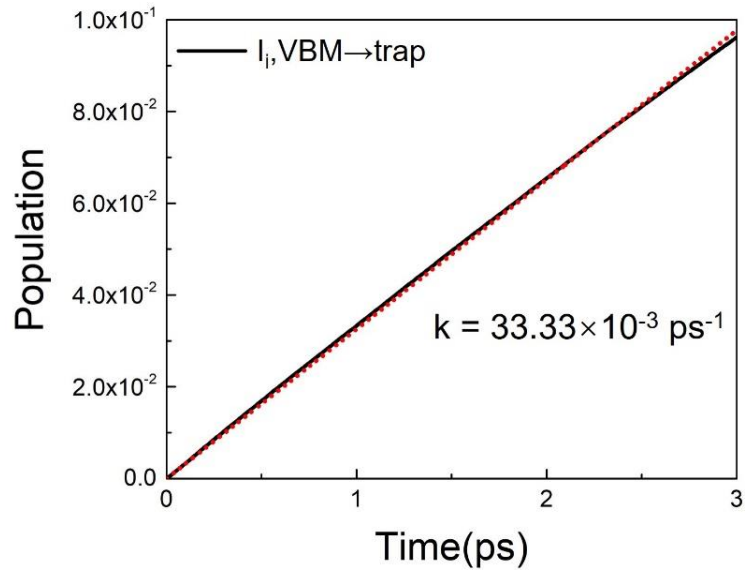

**Figure S7.** Time evolution of the trap state's population due to hole trapping from valence band maximum (VBM) to trap state in  $I_i$ . The fitting function is  $f(t) = t/(0.030 \times 10^6)$ .

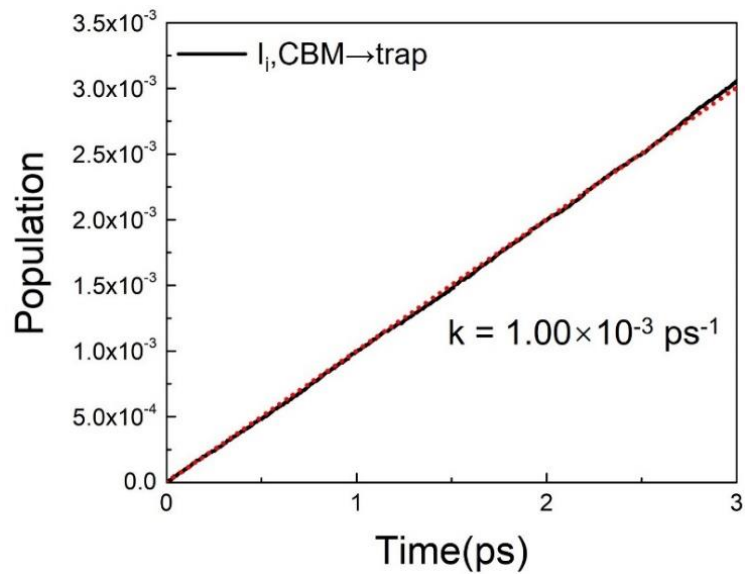

**Figure S8.** Time evolution of the ground state's population due to recombination of the trapped hole with conduction band electron in  $I_i$ . The fitting function is  $f(t) = t/(1.000 \times 10^6)$ .

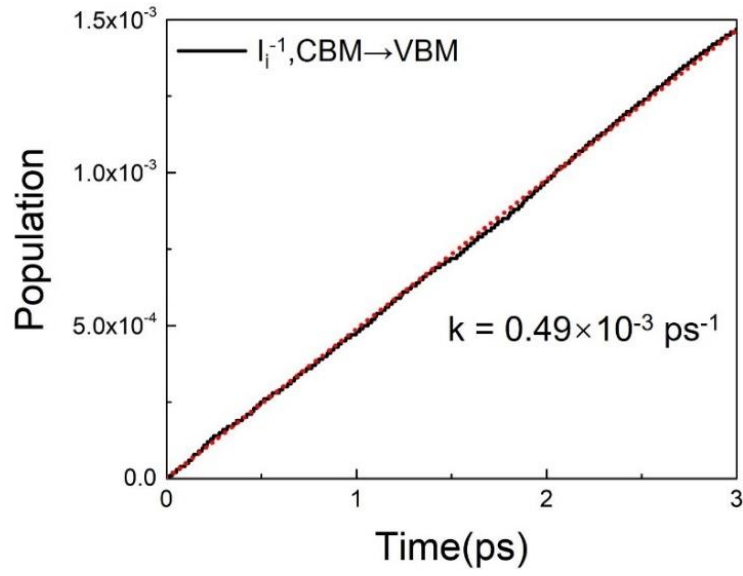

**Figure S9.** Time evolution of the ground state's population due to recombination of the valence band hole with conduction band electron in  $I_i^{-1}$ . The fitting function is  $f(t) = t/(2.045 \times 10^6)$ .

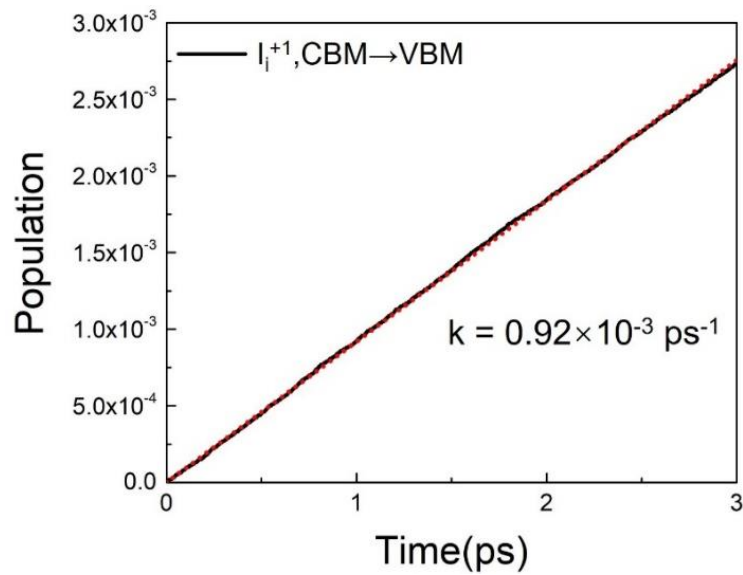

**Figure S10.** Time evolution of the ground state's population due to recombination of the valence band hole with conduction band electron in  $I_i^{+1}$ . The fitting function is  $f(t) = t/(1.088 \times 10^6)$ .

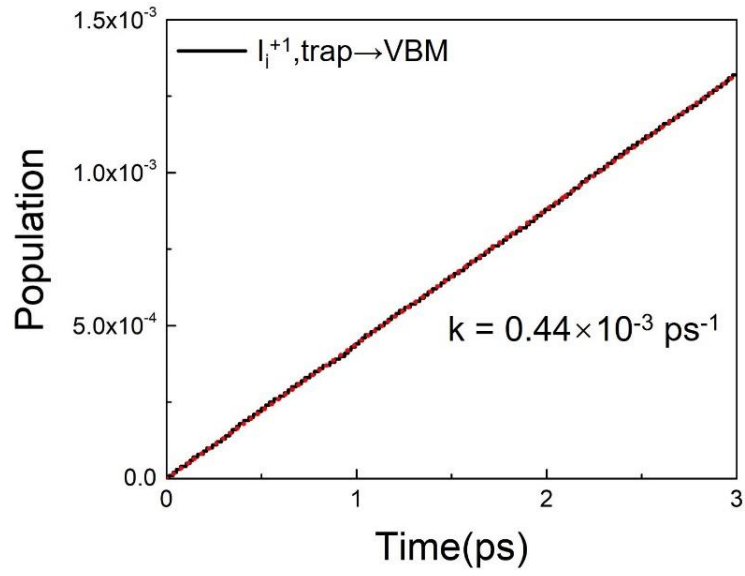

**Figure S11.** Time evolution of the ground state's population due to recombination of the trapped electron with valence band hole in  $I_i^{+1}$ . The fitting function is  $f(t) = t/(2.271 \times 10^6)$ .

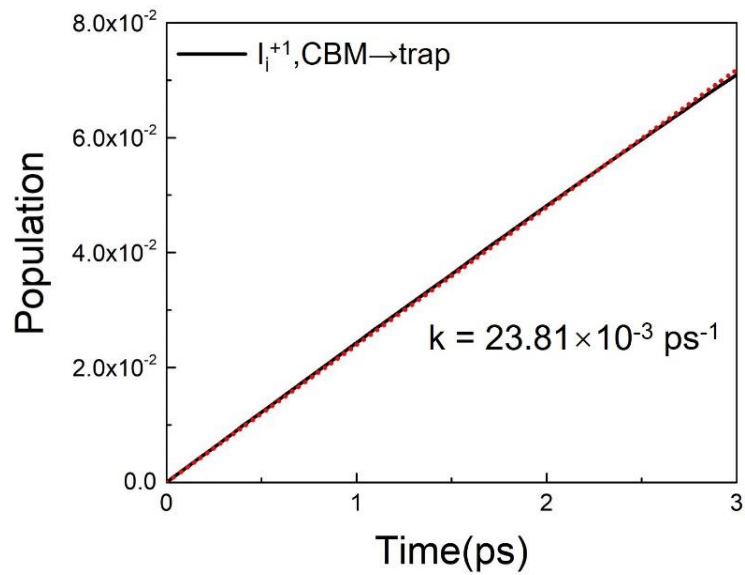

**Figure S12.** Time evolution of the ground state's population due to electron trapping from conduction band minimum (CBM) to trap state in  $I_i^{+1}$ . The fitting function is  $f(t) = t/(0.042 \times 10^6)$ .

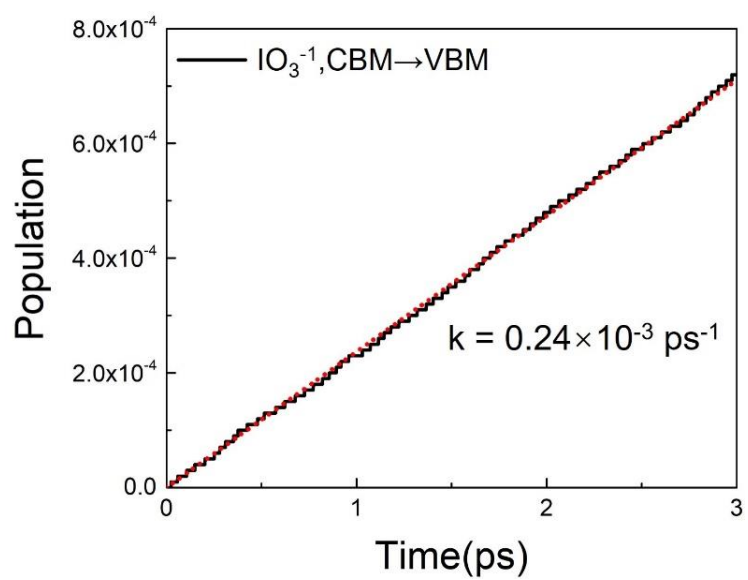

**Figure S13.** Time evolution of the ground state's population due to recombination of the valence band hole with conduction band electron in  $\text{IO}_3^{-1}$ . The fitting function is  $f(t) = t/(4.221 \times 10^6)$ .

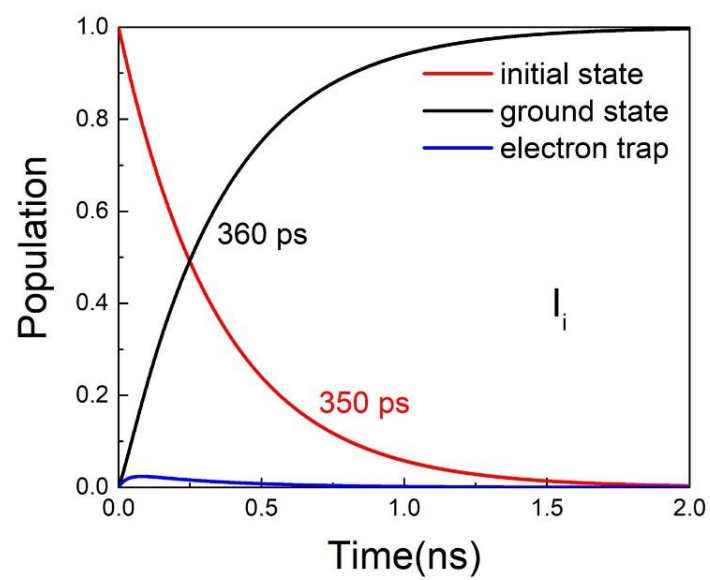

**Figure S14.** Evolution of populations of the key states for electron trapping in  $I_i$ .

**Electronic configurations of product (final) and reactant (initial) states.**

- (1) The electronic configuration of product (final) and reactant (initial) states in the pristine MAPbI<sub>3</sub>, I<sub>i</sub><sup>-1</sup> and IO<sub>3</sub><sup>-1</sup> systems during electron-hole recombination between VBM and CBM:

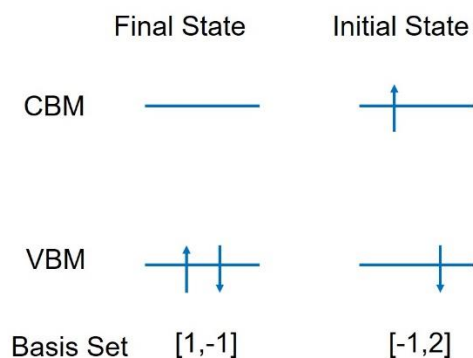

- (2) The electronic configuration of product (final) and reactant (initial) states in the I<sub>i</sub> system for electron-hole recombination between CBM and VBM bypassing the trap state:

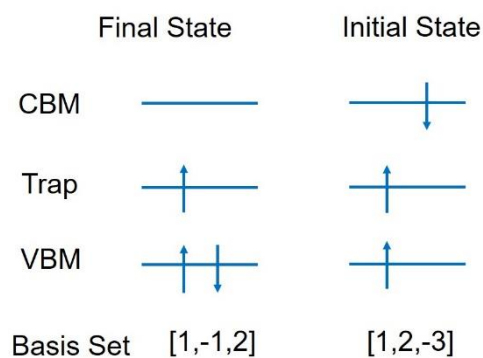

- (3) The electronic configuration of (final) and reactant (initial) states in the  $I_i$  system for recombination between VBM and the trap state:

|      | Final State  | Initial State |
|------|--------------|---------------|
| CBM  | _____        | _____         |
| Trap | _____↑_____  | _____↑↓_____  |
| VBM  | _____↑↓_____ | _____↑_____   |
|      | [1,-1,2]     | [1,2,-2]      |

- (4) The electronic configuration of (final) and reactant (initial) states in the  $I_i$  system for electron trapping between CBM and the trap state:

|           | Final State  | Initial State |
|-----------|--------------|---------------|
| CBM       | _____        | _____↓_____   |
| Trap      | _____↑↓_____ | _____↑_____   |
| VBM       | _____↑_____  | _____↑_____   |
| Basis Set | [1,2,-2]     | [1,2,-3]      |

- (5) The electronic configuration of (final) and reactant (initial) states in the  $I_i$  system for hole trapping assisted recombination between CBM and trap state:

|           | Final State  | Initial State |
|-----------|--------------|---------------|
| CBM       | _____        | _____↑_____   |
| Trap      | _____↑_____  | _____         |
| VBM       | _____↑↓_____ | _____↑↓_____  |
| Basis Set | [1,-1,2]     | [1,-1,3]      |

- (6) The electronic configuration of (final) and reactant (initial) states in the  $I_i$  system for hole trapping between VBM and trap state:

|           | Final State                                                                       | Initial State                                                                      |
|-----------|-----------------------------------------------------------------------------------|------------------------------------------------------------------------------------|
| CBM       |  |  |
| Trap      |  |  |
| VBM       |  |  |
| Basis Set | [1,-1,3]                                                                          | [-1,2,3]                                                                           |

- (7) The electronic configuration of (final) and reactant (initial) states in the  $I_i^{+1}$  for electron-hole recombination between CBM and VBM bypassing the electron trap state:

|           | Final State                                                                         | Initial State                                                                        |
|-----------|-------------------------------------------------------------------------------------|--------------------------------------------------------------------------------------|
| CBM       |  |  |
| Trap      |  |  |
| VBM       |  |  |
| Basis Set | [1,-1]                                                                              | [-1,3]                                                                               |

- (8) The electronic configuration of (final) and reactant (initial) states in the  $I_i^{+1}$  for recombination between VBM and electron trap state:



|           | Final State                                                                       | Initial State                                                                      |
|-----------|-----------------------------------------------------------------------------------|------------------------------------------------------------------------------------|
| CBM       |  |  |
| Trap      |  |  |
| VBM       |  |  |
| Basis Set | [1,-1]                                                                            | [-1,2]                                                                             |

(9) The electronic configuration of (final) and reactant (initial) states in the  $I_i^{+1}$  for electron between CBM and the electron trap state:

|           | Final State                                                                         | Initial State                                                                       |
|-----------|-------------------------------------------------------------------------------------|-------------------------------------------------------------------------------------|
| CBM       |    |    |
| Trap      |   |   |
| VBM       |  |  |
| Basis Set | [-1,2]                                                                              | [-1,3]                                                                              |
